# Supplementary material for: Evolutionary Dynamics of the Interferon-Induced Transmembrane Gene Family in Vertebrates
Source: PubMed Central journal article supplement (PMC3499546; doi:10.1371/journal.pone.0049265), 2012-11-15
Supplement: pone.0049265.s001.pdf [file pone.0049265.s001.pdf]

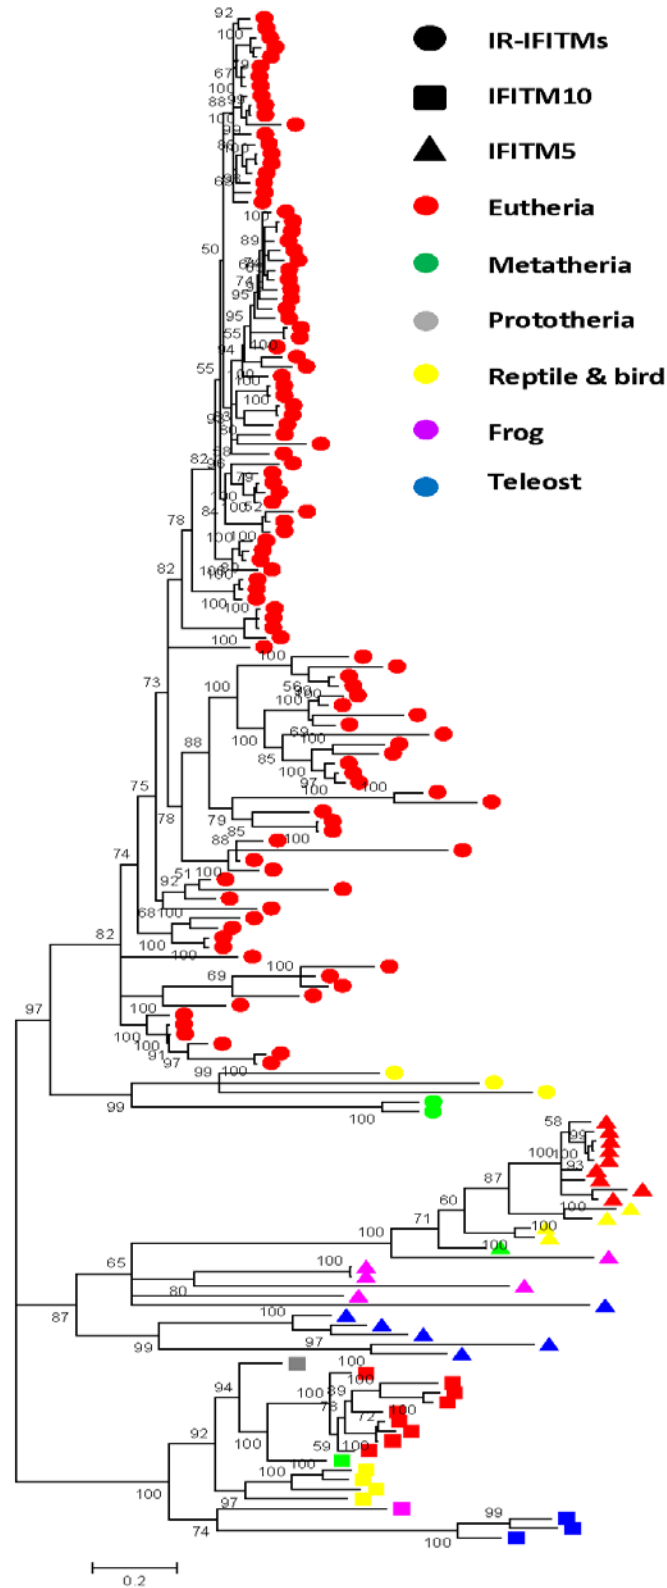

B

**Figure S1. ML (A) and MP (B) trees of the vertebrate IFITM family.** The ML and MP trees were constructed using PHYML v2.4 and PAUP 4.0, respectively. Bootstrap tests were performed with 1,000 replications. For other details, please see Fig. 2.
