# Supplementary material for: Evolutionary Dynamics of the Interferon-Induced Transmembrane Gene Family in Vertebrates
Source: PubMed Central journal article supplement (PMC3499546; doi:10.1371/journal.pone.0049265), 2012-11-15
Supplement: pone.0049265.s007.pdf [file pone.0049265.s007.pdf]

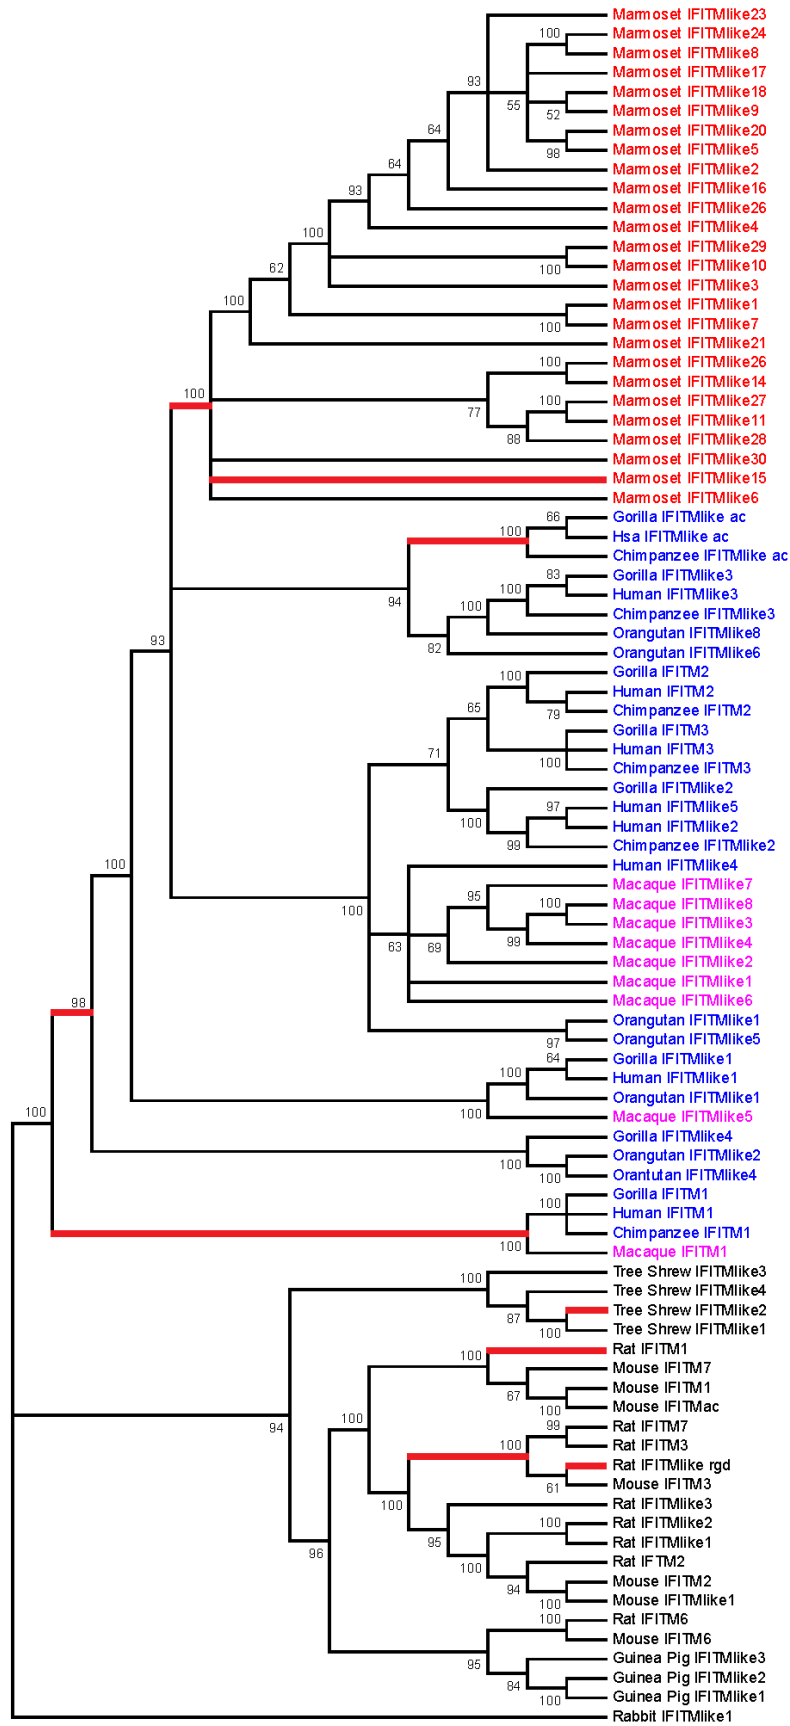

A

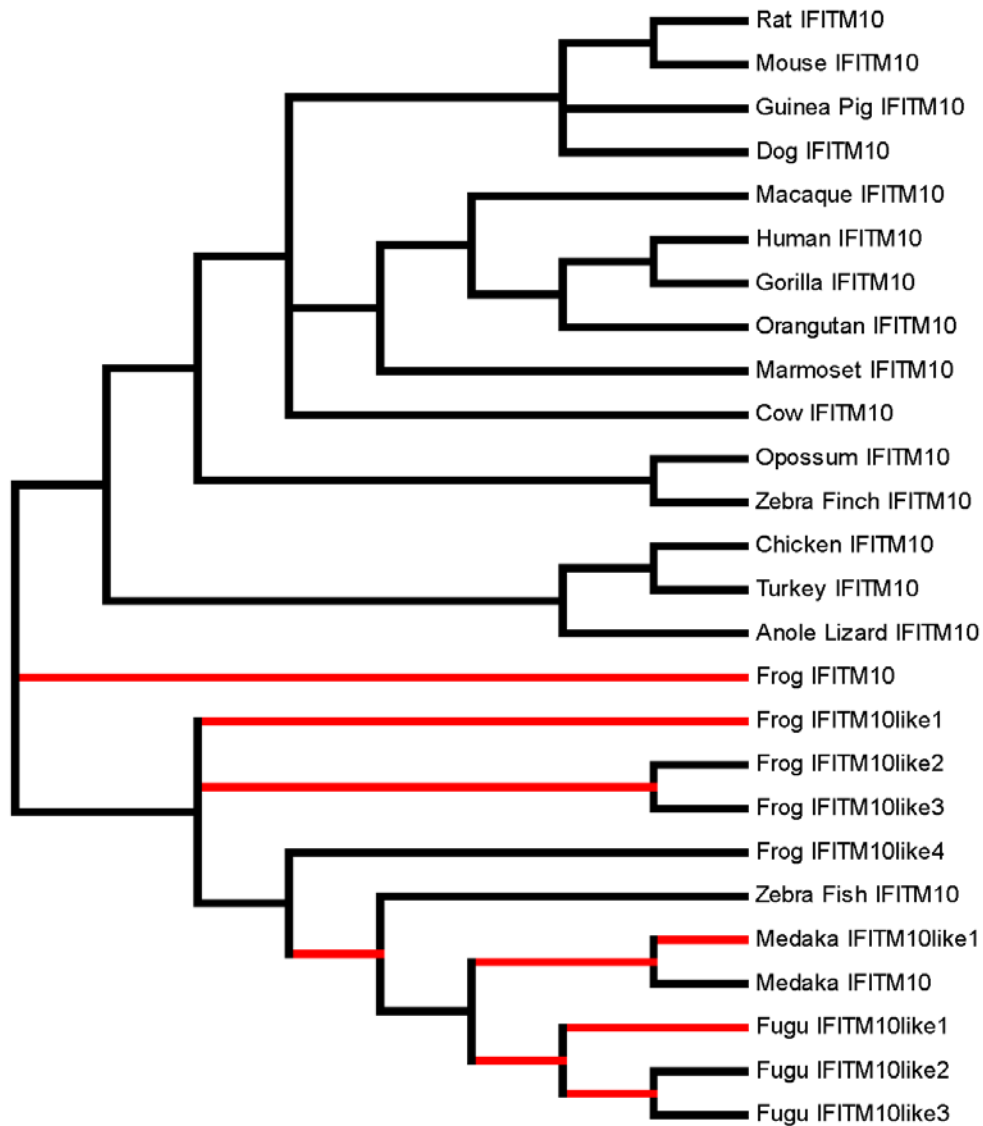

B

**Figure S7. Positive selection analyses of IFITM genes with branch-site Rel model in DATAMONKEY.** Red lines indicate branches under positive selection. A: positive selection in primate and rodent IR-IFITM dataset; B: positive selection in vertebrate IFITM10 dataset.
